# Supplementary material
Source: PubMed Central journal article supplement (PMC3062427)
Supplement: supp_dev.052787_DEV052787TableS2.pdf [file supp_dev.052787_DEV052787TableS2.pdf]

|  |                                                    | +/+ | <i>pyd</i> <sup>[C5]/+</sup> | <i>pyd</i> <sup>[kam]/+</sup> | <i>pyd</i> <sup>[1]/+</sup> | <i>pyd</i> <sup>[LL]/+</sup> | <i>Sema-1a</i> <sup>[k]/+</sup> | <i>trio</i> <sup>[1]/+</sup> | <i>Rac1</i> <sup>[J11]/+</sup> |
|--|----------------------------------------------------|-----|------------------------------|-------------------------------|-----------------------------|------------------------------|---------------------------------|------------------------------|--------------------------------|
|  | <i>n</i>                                           | 26  | 24                           | 20                            | 24                          | 20                           | 30                              | 50                           | 61                             |
|  | Wild type                                          | 31  | 33                           | 40                            | 50                          | 60                           | 40                              | 78                           | 2                              |
|  | Abnormal $\alpha/\beta$ morphology                 | 35  | 67                           | 60                            | 50                          | 40                           | 53                              | 20                           | 10                             |
|  | $\alpha/\beta$ misguidance (+ abnormal morphology) | 35  | 0                            | 0                             | 0                           | 0                            | 6                               | 2                            | 2                              |
|  | $\alpha/\beta$ axon stalling                       | 0   | 0                            | 0                             | 0                           | 0                            | 0                               | 0                            | 87                             |

|          |                | +/+ | <i>Sema-1a</i> <sup>[k]/+</sup> | <i>trio</i> <sup>[1]/+</sup> | <i>Rac1</i> <sup>[J11]/+</sup> |
|----------|----------------|-----|---------------------------------|------------------------------|--------------------------------|
|          | <i>n</i>       | 26  | 26                              | 26                           | 18                             |
| $\alpha$ | Wild type      | 100 | 94                              | 100                          | 0                              |
|          | Misguidance    | 0   | 0                               | 0                            | 0                              |
|          | Thin or absent | 0   | 4                               | 0                            | 100                            |
| $\beta$  | Wild type      | 100 | 73                              | 100                          | 0                              |
|          | Misguidance    | 0   | 12                              | 0                            | 0                              |
|          | Overextension  | 0   | 15                              | 0                            | 0                              |
|          | Thin or absent | 0   | 0                               | 0                            | 100                            |
|          | <i>n</i>       | 26  | 20                              | 22                           | 26                             |
| $\alpha$ | Wild type      | 100 | 100                             | 100                          | 62                             |
|          | Misguidance    | 0   | 0                               | 0                            | 8                              |
|          | Thin or absent | 0   | 0                               | 0                            | 31                             |
| $\beta$  | Wild type      | 100 | 100                             | 100                          | 35                             |
|          | Misguidance    | 0   | 0                               | 0                            | 35                             |
|          | Overextension  | 0   | 0                               | 0                            | 0                              |
|          | Thin or absent | 0   | 0                               | 0                            | 31                             |

MB  $\alpha$  and  $\beta$  lobe phenotypes were scored in flies with (A) a mutation in *Nrg* and an additional mutation in either *pyd*, *Sema-1a*, *trio* and *Rac1*; (B) a mutation in *pyd*, *Sema-1a*, *trio* and *Rac1* in an OK107-driven NRG-180 overexpression background; and (C) a mutation in *pyd* and an additional mutation in *Sema-1a*, *trio* and *Rac1*. *n* is the number of brain hemispheres analyzed. The other numbers are percentages of analyzed hemispheres with the specified phenotype. The *Nrg*<sup>GFP/+</sup>;*Rac1*<sup>J11/+</sup> genotype is lethal.
